# Supplementary material for: Evaluation of MERRA-2 Black Carbon Characteristics and Potential Sources over China
Source: MDPI journal article supplement (doi:10.3390/atmos14091378), 2023-08-31
Supplement: s1 [file s1]

## Supplementary Materials:

# Evaluation of MERRA-2 Black Carbon Characteristics and Potential Sources over China

Mao Mao <sup>1,2,\*</sup>, Yu Zhou <sup>2</sup> and Xiaolin Zhang <sup>2,3</sup>

<sup>1</sup> School of Atmosphere science and Remote Sensing, Wuxi University, Wuxi 214105, China

<sup>2</sup> Key Laboratory for Aerosol-Cloud-Precipitation of China Meteorological Administration, School of Atmospheric Physics, Nanjing University of Information Science & Technology, Nanjing 210044, China; 20201248035@nuist.edu.cn (Y.Z.); xlnzhang@nuist.edu.cn (X.Z.)

<sup>3</sup> State Key Laboratory of Atmospheric Boundary Layer Physics and Atmospheric Chemistry, Institute of Atmospheric Physics, Chinese Academy of Sciences, Beijing 100029, China

\* Correspondence: mmao@nuist.edu.cn

**Table S1.** Information of the ground-based sites over China.

| ID | Station                          | Longitude (degree) | Latitude (degree) | Type        | Province     | Region        |
|----|----------------------------------|--------------------|-------------------|-------------|--------------|---------------|
| 1  | Qilianshan <sup>[1]</sup>        | 96.30              | 39.30             | Countryside | Qinhai       | Northwest     |
| 2  | Lanzhou <sup>[2]</sup>           | 103.51             | 36.00             | Urban       | Gansu        |               |
| 3  | Wulumuqi <sup>[3]</sup>          | 87.35              | 43.53             | Urban       | Xinjiang     |               |
| 4  | Xian <sup>[4]</sup>              | 108.55             | 34.17             | Urban       | Shaanxi      |               |
| 5  | Waliguan <sup>[5]</sup>          | 100.54             | 36.17             | Background  | Qinhai       |               |
| 6  | Taklimakan Desert <sup>[6]</sup> | 83.39              | 38.58             | Countryside | Xinjiang     |               |
| 7  | Chengdu <sup>[7]</sup>           | 103.59             | 30.35             | Urban       | Sichuan      | Southwest     |
| 8  | Chongqing <sup>[8]</sup>         | 106.30             | 29.36             | Urban       | Chongqing    |               |
| 9  | Guiyang <sup>[9]</sup>           | 106.07             | 26.11             | Urban       | Guizhou      |               |
| 10 | Lasa <sup>[10]</sup>             | 91.10              | 29.60             | Urban       | Xizang       |               |
| 11 | Linan <sup>[11]</sup>            | 119.42             | 30.13             | Background  | Zhejiang     | East China    |
| 12 | Nanjing <sup>[12]</sup>          | 118.70             | 32.20             | Urban       | Jiangsu      |               |
| 13 | Suzhou <sup>[13]</sup>           | 120.65             | 31.38             | Urban       | Jiangsu      |               |
| 14 | Shanghai <sup>[14]</sup>         | 121.25             | 31.10             | Urban       | Shanghai     |               |
| 15 | Huimin <sup>[15]</sup>           | 117.53             | 37.49             | Countryside | Shandong     |               |
| 16 | Hefei <sup>[16]</sup>            | 117.19             | 31.90             | Urban       | Anhui        |               |
| 17 | Shouxian <sup>[17]</sup>         | 116.47             | 32.26             | Countryside | Anhui        |               |
| 18 | Guilin <sup>[11]</sup>           | 110.18             | 25.19             | Urban       | Guangxi      | Central South |
| 19 | Zhengzhou <sup>[11]</sup>        | 113.65             | 34.72             | Urban       | Henan        |               |
| 20 | Panyu <sup>[18]</sup>            | 113.21             | 23.00             | Countryside | Guangdong    |               |
| 21 | Wuhan <sup>[19]</sup>            | 114.31             | 30.59             | Urban       | Hubei        |               |
| 22 | Dongguan <sup>[20]</sup>         | 113.75             | 23.02             | Urban       | Guangdong    |               |
| 23 | Shenzhenxichong <sup>[21]</sup>  | 114.33             | 22.29             | Background  | Guangdong    |               |
| 24 | Shenzhenzhuzilin <sup>[21]</sup> | 114.03             | 22.32             | Urban       | Guangdong    |               |
| 25 | Beijing <sup>[22]</sup>          | 116.47             | 39.80             | Urban       | Beijing      | North China   |
| 26 | Tianjin <sup>[23]</sup>          | 117.12             | 39.04             | Urban       | Tianjin      |               |
| 27 | Shijiazhuang <sup>[24]</sup>     | 114.53             | 37.98             | Urban       | Hebei        |               |
| 28 | Handan <sup>[25]</sup>           | 114.50             | 36.57             | Urban       | Hebei        |               |
| 29 | Changchun <sup>[26]</sup>        | 125.13             | 43.54             | Urban       | Jilin        | Northeast     |
| 30 | Shenyang <sup>[26]</sup>         | 123.31             | 41.44             | Urban       | Shenyang     |               |
| 31 | Fuxun <sup>[26]</sup>            | 124.05             | 41.55             | Urban       | Liaoning     |               |
| 32 | Benxi <sup>[26]</sup>            | 123.47             | 41.19             | Urban       | Liaoning     |               |
| 33 | Anshan <sup>[26]</sup>           | 123.00             | 41.05             | Urban       | Liaoning     |               |
| 34 | Dalian <sup>[26]</sup>           | 121.38             | 38.54             | Urban       | Liaoning     |               |
| 35 | Longfengshan <sup>[26]</sup>     | 127.36             | 44.44             | Background  | Heilongjiang |               |

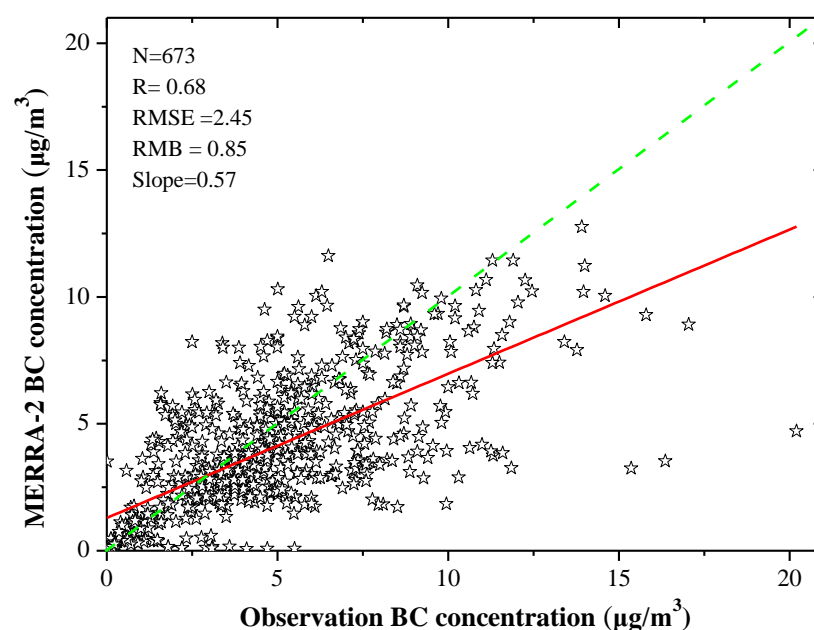

**Figure S1.** Comparison of the monthly average MERRA-2 BC concentration and ground observations over China. The green and red line mean 1:1 path and fitted line, respectively.

## Reference

1. Zhao, S.Y.; Ming, J.; Xiao, C. D. A preliminary study on measurements of black carbon in the atmosphere of northwest Qilian Shan. *J. Environ. Sci.* **2012**, *24*, 152–159.
2. Zhang W. Analysis on the Variation Characteristics of Black Carbon Aerosol Concentration in the Main Urban Area of Lanzhou. *J. Agric. Catastrophology* **2022**, *12*, 149–151.
3. Fan, S.H. Analysis on the Time Variation Characteristics and Influencing Foetors of Black Carbon Aerosol Factors in Urumqi. *Environ. Prot. Xinjiang* **2021**, *43*, 28–36.
4. Liu, L.Z.; Wang, Y.X.; Yao, Y.; Han, J.; Li, W.T.; Han, Z.L. Concentration Characteristics and the Correlations of Black Carbon Aerosols with Meteorological Factors and Conventional Pollutants in Xi'an. *Environ. Monit. China* **2016**, *32*, 45–50.
5. Tang, J.; Wen, Y.P.; Zhou, L.X.; Qi, D.L.; Zheng, M.; Neil, T.; Erika, W. Observational study of black carbon in clean air area of western China. *Quarterly J. Appl. Meteorol.* **1999**, *10*, 160–169.
6. Lu, H.; Wei, W.S.; Cui, C.; Wu, X.P. Concentration of black carbon in the hinterland of the Taklimakan Desert. *J. Desert Res.* **2014**, *34*, 1087–1093.
7. Wang, L.; Yuan, L.; Zhang, X.L.; Jia, Y.T. Characteristics and Source Apportionment of Black Carbon in Chengdu. *Environ. Sci.* **2020**, *41*, 1561–1572.
8. Zhong, J.; Zhai, C.Z.; Yu, J.Y.; Xu, L.P.; Peng, C.; Chen, L. Concentration characteristics of black carbon aerosol and its impact factors in Chongqing core area. *Chin. J. Environ. Eng.* **2016**, *10*, 805–810.
9. Zhou, R.G.; Liang, L.C.; Xiao, D.A.; Dong, X.; Chen, Z.; Qiu, G.L. Characteristics and Source Apportionment of Black Carbon in the Atmosphere of Typical Plateau City in Southwest China. *Earth Environ.* **2021**, *49*, 375–380.
10. Gao, R.X.; Zhang, H.; Niu, S.J. Study of Characteristics of Black Carbon Aerosol and Atmospheric Particles over the Lhasa Area of China. Proceedings of the 26th Annual Meeting of the Chinese Meteorological Society on Atmospheric Composition, Weather and Climate, and Environmental Change 2009, 644–651.
11. Xu, X.F.; Yang, X.Y.; Zhu, B.; Tang, Z.W.; Wu, H.; Xie, L.F. Characteristics of MERRA-2 back carbon variation is east China during 2000–2016. *Atmos. Environ.* **2020**, *222*, 117140.
12. The black carbon (BC) sample data in Nanjing comes from actual observations by our research group. The sampling site in the Jiangbei New Area of Nanjing, was located at the top of meteorological building in Nanjing University of Information Science and Technology (NUIST), which is 40 m above the ground. BC mass concentration were observed with an Aethalometer model AE-33 (Magee SCIENTIFIC, USA) during 2020, and the data measured at 880 nm are taken as the mass concentration values of BC.
13. Zeng, C.; Zhu, J.; Li, J.; Yang, Y.F. Characteristics and sources of black carbon aerosols in Suzhou. *J. Mar. Meteorol.* **2023**, *43*, 87–100.

14. Feng, J. L.; Zhong, M.; Xu, B. H. Concentrations, seasonal and diurnal variations of black carbon in PM<sub>2.5</sub> in Shanghai, China. *Atmos. Res.* **2014**, *147*, 147–148, 1–9.
15. Zhang, Y.J.; Tu, A.Q.; Zhang, W.; Bian, Z.; Wang, L.J. Variation characteristics and source analysis of black carbon aerosols in Huimin, Shandong. *J. Mar. Meteorol.* **2021**, *41*, 86–96.
16. Zhang, X.L.; Rao, R.Z.; Huang, Y.B.; Mao, M.; Berg, M.J.; Sun, W.B. Black carbon aerosols in urban central China. *J. Quant. Spectrosc. Radiat. Transf.* **2015**, *150*, 3–11.
17. Wei, X.L.; Wang, C.G.; Ling, X.F.; Yi, M.J. Observational study of black carbon at Shouxian in Anhui Province. *Acta Sci. Circumstantiae* **2019**, *39*, 3630–3638.
18. Wu, D.; Mao, J.T.; Deng, X. J.; Tie, X.X.; Zhang, Y.H.; Zeng, L.M.; Li, F.; Tang, H.B.; Bi, X.Y.; Huang, X.Y.; Chen, J.; Deng, T. Black carbon aerosols and their radiative properties in the Pearl River Delta region. *Sci. China Ser. D–Earth Sci.* **2009**, *52*, 1152–1163.
19. Huang, C.; Zhao, J.H.; He, C.; Liu, Y.Q.; Li, X.L.; Liu, S.K. The analysis of distribution and source area of black carbon aerosol in Wuhan City in autumn and winter of 2015. *Ecol. Environ. Sci.* **2018**, *27*, 542–549.
20. Chen, L.; Luo, K.; Huang, P.G.; Yuan, Z.Y.; Yin, S.X. Variation characteristics of black carbon mass concentration in Dongguan during 2009. *Guangdong Meteorol.* **2012**, *34*, 38–41.
21. Cheng, D.; Wu, C.; Wu, D.; Liu, J.; Song, L.; Sun, T.L.; Mao, X.; Jiang, Y.; Liu, A.M. Comparative study on the characteristics of black carbon aerosol in urban and suburban areas of Shenzhen. *China Environ. Sci.* **2018**, *38*, 1653–1662.
22. Zhang, X.; Tang, J.; Wu, Y.F.; Wu, J.; Yang, P.; Zhang, R.J. Variations of Black Carbon Aerosol Observed in Beijing and Surrounding Area During 2006–2012. *China Power Sci. Technol.* **2015**, *21*, 24–29.
23. Yao, Q.; Cai, Z.Y.; Han, S.Q.; Huang, H. Observational and analysis of black carbon aerosol in the autumn and winter in Tianjin. *Environ. Chem.* **2012**, *31*, 327–329.
24. Guan, Y. N.; Lu, J.J.; Zhang, Y.S.; Zhao, Y.G.; Hang, J.; Xiao, J.Y.; Duan, E.H.; Hou, L.A. Pollution characteristics and source apportionment of black carbon aerosol in the south suburb of Shijiazhuang City. *Acta Sci. Circumstantiae* **2020**, *40*, 3146–3154.
25. Qi, M. Y.; Wang, L.T.; Zhang, C.Y.; Ma, X.; Zhao, L.; Ji, S.P.; Lu, X.H.; Wang, Y. Variation of black carbon aerosol concentration and its influencing factors in Handan City, Hebei Province. *Acta Sci. Circumstantiae* **2018**, *38*, 1751–1758.
26. Yang, M. Characteristics of Black Carbon and its Health Benefits Assessment in Northeast China. Master thesis, Chengdu University of Information Technology, Chengdu, China, 2020.
